# Supplementary material for: miR-363-5p regulates endothelial cell properties and their communication with hematopoietic precursor cells
Source: PubMed Central journal article supplement (PMC3874849; doi:10.1186/1756-8722-6-87), 2013-11-21
Supplement: 1756-8722-6-87-S2.pdf [file 1756-8722-6-87-S2.pdf]

## Additional file 2

**Additional file 2 - miRNA expression of eight miRNAs recovered from the microarray data (from Figure 1) throughout the BM dysfunction model.** Levels were quantified by qRT-PCR in whole bone marrow seven days after the first, second and third irradiations. Results confirm the great increase of miR-363-5p levels in the BM after the third irradiation

| miRNA        | Fold change compared to non-irradiated mice control after first, second and third irradiations |      |      |
|--------------|------------------------------------------------------------------------------------------------|------|------|
|              | 1x                                                                                             | 2x   | 3 x  |
| hsa-miR-363* | 0.9                                                                                            | 1.56 | 6.57 |
| hsa-miR-548  | 0.99                                                                                           | 0.91 | 2.03 |
| hsa-miR-223* | 0.68                                                                                           | 0.92 | 1.06 |
| mmu-miR-136  | 0.72                                                                                           | 0.61 | 0.88 |
| hsa-miR-451  | 1.83                                                                                           | 1.60 | 0.58 |
| hsa-miR-141* | 1.85                                                                                           | 0.76 | 0.29 |
| hsa-miR-144  | 0.35                                                                                           | 0.13 | 0.01 |
| hsa-miR-144* | 0.89                                                                                           | 1.18 | 0.01 |
