# Supplementary material for: miR-363-5p regulates endothelial cell properties and their communication with hematopoietic precursor cells
Source: PubMed Central journal article supplement (PMC3874849; doi:10.1186/1756-8722-6-87), 2013-11-21
Supplement: 1756-8722-6-87-S3.pdf [file 1756-8722-6-87-S3.pdf]

### Additional file 3

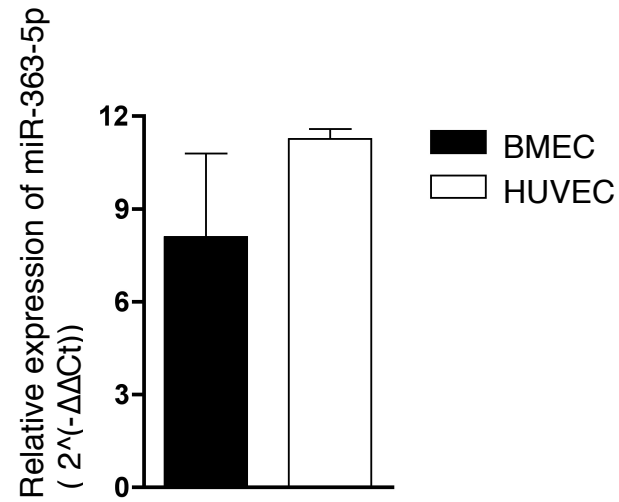

**Additional file 3 - Levels of miR-363-5p detected by qRT-PCR in control non-irradiated HUVECs and BMEC.** Error bars represent s.e.m. of the mean expression.
