# Supplementary material for: miR-363-5p regulates endothelial cell properties and their communication with hematopoietic precursor cells
Source: PubMed Central journal article supplement (PMC3874849; doi:10.1186/1756-8722-6-87), 2013-11-21
Supplement: 1756-8722-6-87-S5.pdf [file 1756-8722-6-87-S5.pdf]

## Additional file 5

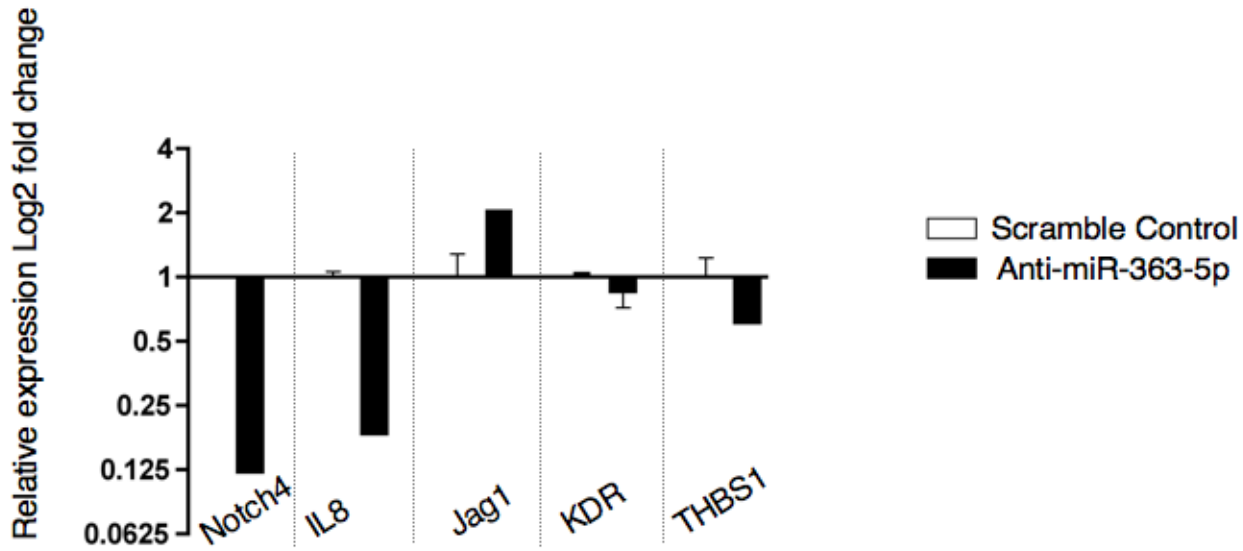

**Additional file 5 - Validation of angiocrine and angiogenic-related genes by qRT-PCR.** Five genes were selected (Notch4, interleukin8 (IL8), Jag1, KDR (VEGFR2) and Thrombospondin1 (THBS1)). Data represent the mean  $\pm$  s.e.m. of the expression from two independent experiments.
