# Supplementary material for: miR-363-5p regulates endothelial cell properties and their communication with hematopoietic precursor cells
Source: PubMed Central journal article supplement (PMC3874849; doi:10.1186/1756-8722-6-87), 2013-11-21
Supplement: 1756-8722-6-87-S9.pdf [file 1756-8722-6-87-S9.pdf]

## Additional file 9

Sequence of the primers and experimental application. h, Human; m, Mouse.

Sequence of all the miRNAs used in the study are also shown.

| Oligonucleotide | Sequence (5' to 3')              | Purpose                                                      |
|-----------------|----------------------------------|--------------------------------------------------------------|
| h18S rRNA FWD   | GCCCTATCAAACCTTCGATGGTAGT        | normalization<br>coding genes                                |
| h18S rRNA REV   | CCGGAATCGAACCCCTGATT             |                                                              |
| mB-actin FWD    | AGCCATGTACGTAGCCATCC             | normalization<br>coding genes                                |
| mB-actin REV    | CTCTCAGCTGTGGTGGTGAA             |                                                              |
| hNotch4 FWD     | TAGGGCTCCCAGCTCTC                | validation of<br>PCR arrays<br>and/or<br>angiocrine<br>genes |
| hNotch4 REV     | GGCAGGTGCCCCATT                  |                                                              |
| hIL8 FWD        | CTGGCCGTGGCTCTCTTG               |                                                              |
| hIL8 REV        | CCTTGGCAAAACTGCACCTT             |                                                              |
| hJAG1 FWD       | CGGCTTTGCCATGTGCTT               |                                                              |
| hJAG1 REV       | TCTTCCTCCATCCCTCTGTC             |                                                              |
| hTIMP1 FWD      | TGTTGTTGCTGTGGCTGATAGC           |                                                              |
| hTIMP1 REV      | AATTGCAGAAGGCCGTCTGT             |                                                              |
| hTHBS1 FWD      | TGGAGCGGAAAGACCACTCT             |                                                              |
| hTHBS1 REV      | CCGCCTTGCCATTGGA                 |                                                              |
| hIGF1 FWD       | GGTGGATGCTCTTCAGTTCGT            |                                                              |
| hIGF1 REV       | TACCTGTGGGCTTGTGAAA              |                                                              |
| hSDF1 FWD       | CAGATGCCCATGCCGATT               |                                                              |
| hSDF1 REV       | AGTTTGGAGTGTGAGAATTTGAGA         |                                                              |
| hDLL1 FWD       | ATGCCTTCGGCCACTTCAC              |                                                              |
| hDLL1 REV       | CACATCCAGGCAGGCAGAT              |                                                              |
| hCXCR4 FWD      | CAGTGGCCGACCTCCTCTT              |                                                              |
| hCXCR4 REV      | CAGTTTGCCACGGCATCA               |                                                              |
| hDLL4 FWD       | GTGGGTCAGAACTGGTTATTGGA          |                                                              |
| hDLL4 REV       | TGCAGATGACCCGGTAAGAGT            |                                                              |
| hANG2 FWD       | GCATTGAAGCTTAGTCCACCTGAGGAACTG   |                                                              |
| hANG2 REV       | CCGATACACTAGTCCCTCGGGTTCATCTTTGC |                                                              |
| hBAMBI FWD      | TGCCGTGCCCATTGCT                 |                                                              |
| hBAMBI REV      | GCATCCTCAGGGCCAACA               |                                                              |
| hANGPTL3 FWD    | CACGAAACCAACTATACGCTACATCT       |                                                              |
| hANGPTL3 REV    | TGAAGTGTCTTTTGCTTTGTGA           |                                                              |
| hSCF FWD        | GTGGATGACCTTGTGGAGTGCCT          |                                                              |
| hSCF REV        | GCCTGGGTTCTGGGCTCTTGA            |                                                              |
| hAMAC1L2 FWD    | CCCACCAAGCCAGATAGGAA             | validation of<br>transcriptomic<br>analyses                  |
| hAMAC1L2 REV    | GGGCTTCTGGTCTATCGTTCTCT          |                                                              |
| hBAD FWD        | CGAGTTTGTGGACTCCTTTAAGAAG        |                                                              |
| hBAD REV        | TCCCACCAGGACTGGAAGAC             |                                                              |
| hBST1 FWD       | TTACCGACCAGTGAAGCTCTTACA         |                                                              |
| hBST1 REV       | GCCGACTTTAAGGCACAGTCA            |                                                              |
| hESAM FWD       | CAGTGGGATCGGCAGCTT               |                                                              |
| hESAM REV       | AAAGACCCACGGATGACATCTAA          |                                                              |
| hFCER1G FWD     | GATGCCATCCTGTTTCTGTATGG          |                                                              |
| hFCER1G REV     | TTATAGCTGCCTTTTCGCACTTG          |                                                              |
| hIKBK G FWD     | AGGACCCCGCAGACTATCAA             |                                                              |
| hIKBK G REV     | CTCGATGATGCTGGAGAGCTT            |                                                              |
| hMAPK13 FWD     | CTGTGCCCATGGACAACCTCTAC          |                                                              |
| hMAPK13 REV     | TTCCCTGTGGACCAGTCTACTAGCA        |                                                              |
| hSELE FWD       | TTCCCTTGGTAGCTGGACTTTC           |                                                              |
| hSELE REV       | TTTCCGAAGCCAGAGGAGAA             |                                                              |

|                    |                                           |                                                                  |                                       |
|--------------------|-------------------------------------------|------------------------------------------------------------------|---------------------------------------|
| hTHBS3 FWD         | GGCGCACACACACAGTTCTC                      |                                                                  |                                       |
| hTHBS3 REV         | CTGCATGTTGGTCACCCAGTT                     |                                                                  |                                       |
| TIMP1 FWD EXT      | CCGATACACTAGTCTGGAACAGCCTGAGCTTAG         | primers with restriction enzymes sites to clone into pMIR-REPORT |                                       |
| TIMP1 REV EXT      | GCATTGAAGCTTCCGGAAGAAAGATGGGAGTG          |                                                                  |                                       |
| SELE FWD EXT       | GCATTGAAGCTTTTCTGTTGCCTAGACTGGAGTG        |                                                                  |                                       |
| SELE REV EXT       | CCGATACACTAGTGAACCAGACTGCCAGAGTTTG        |                                                                  |                                       |
| IKBKG FWD EXT      | GCATTGAAGCTTGCTTTCCTCTCCCGCCTGCCTAGCC     |                                                                  |                                       |
| IKBKG REV EXT      | CCGATACACTAGTCACCCGTGTGCATGGTAAG          |                                                                  |                                       |
| THBS3 FWD EXT      | GCATTGAAGCTTGGCCCACCAGATTCAGAATTCAG       |                                                                  |                                       |
| THBS3 REV EXT      | CCGATACACTAGTTTTGGGAGCCAGAGAAGG           |                                                                  |                                       |
| TIMP1 MUT1 FWD     | TCGTGTTTCCCTGTTTAAGGTGGCCCCTGCAAACTG      |                                                                  | primers for site-directed mutagenesis |
| TIMP1 MUT1 REV     | TTAAACAGGGAAACACGACACGATTCCTCACAGCCAACAG  |                                                                  |                                       |
| TIMP1 MUT2 FWD     | AGCTGAAGCCTGCACAGTGTGGTGGCTGTTCCCCTC      |                                                                  |                                       |
| TIMP1 MUT2 REV     | ACACTGTGCAGGCTTCAGCTTCCACTC               |                                                                  |                                       |
| THBS3 MUT FWD      | TTAGACCCTTTGGCCTTGGGGTCCATCCTGGAGACCCTGAG |                                                                  |                                       |
| THBS3 MUT REV      | CCCCAAGGCCAAAGGGTCTAAAATTCTGAATTCGAATC    |                                                                  |                                       |
| U6 FWD             | GTGCTCGCTTCGGCAGCACATATAC                 | normalization of miRNA levels                                    |                                       |
| U6 REV             | AAAAATATGGAACGCTTCACGAATTTG               |                                                                  |                                       |
| hsa-miR-363-5p     | CGGGTGGATCACGATGCAATTT                    | miRNAs quantified by qRT-PCR                                     |                                       |
| hsa-miR-223-5p     | CGTGTATTTGACAAGCTGAGTT                    |                                                                  |                                       |
| hsa-miR-548-3p     | CAAAAACCACAGTTTCTTTTGC                    |                                                                  |                                       |
| hsa-miR-141-5p     | CATCTTCCAGTACAGTGTGGGA                    |                                                                  |                                       |
| hsa-miR-144-5p     | GGATATCATCATATACTGTAAG                    |                                                                  |                                       |
| hsa-miR-92a-2-3p   | TATTGCACTTGTCCCGCCTGT                     |                                                                  |                                       |
| hsa-miR-18b-5p     | TAAGGTGCATCTAGTGCAGTTAG                   |                                                                  |                                       |
| hsa-miR-20b-5p     | CAAAGTGCTCATAGTGCAGGTAG                   |                                                                  |                                       |
| hsa-miR-106a-5p    | AAAAGTGCTTACAGTGCAGGTAG                   |                                                                  |                                       |
| hsa-miR-19b-3p     | TGTGCAAATCCATGCAAACCTGA                   |                                                                  |                                       |
| pre-miR-363-5p FWD | GCAGCAACTAGAAACG                          |                                                                  |                                       |
| pre-miR-363-5p REV | GCACTCATGCCATTCATCC                       |                                                                  |                                       |
